# Supplementary material for: Microstructured layered-kagome BaCo3(VO4)2(OH)2 with variable crystallite size: alternative synthetic route and comparison with nanostructured samples
Source: Royal Society of Chemistry journal article supplement (doi:10.1039/d2dt04110c), 2023-01-01
Supplement: d2dt04110c1.pdf [file d2dt04110c1.pdf]

## Electronic Supplementary Information

### Microstructured layered-kagome $\text{BaCo}_3(\text{VO}_4)_2(\text{OH})_2$ with variable crystallite size: alternative synthetic route and comparison with nanostructured samples

Bachchar Hadrane,<sup>a</sup> Philippe Deniard,<sup>a</sup> Cassandre Jeannot,<sup>a</sup> Isabelle Trenque,<sup>a</sup> Rémi Dessapt\*<sup>a</sup> and Christophe Payen\*<sup>a</sup>

<sup>a</sup> Nantes Université, CNRS, Institut des Matériaux de Nantes Jean Rouxel, IMN, F-44000 Nantes

#### Table of contents:

|                                                                                                                                                                                   |   |
|-----------------------------------------------------------------------------------------------------------------------------------------------------------------------------------|---|
| <b>Figure S1.</b> Rietveld refinement plot for $\text{Co}_3\text{V}_2\text{O}_7(\text{OH})_2 \cdot 2\text{H}_2\text{O}$ showing observed, calculated and difference patterns..... | 2 |
| <b>Figure S2.</b> Crystal structure of $\text{Co}_3\text{V}_2\text{O}_7(\text{OH})_2 \cdot 2\text{H}_2\text{O}$ .....                                                             | 3 |
| <b>Table S1.</b> Structural parameters and crystallite size of $\text{Co}_3\text{V}_2\text{O}_7(\text{OH})_2 \cdot 2\text{H}_2\text{O}$ .....                                     | 3 |
| <b>Figure S3.</b> SEM image of $\text{Co}_3\text{V}_2\text{O}_7(\text{OH})_2 \cdot 2\text{H}_2\text{O}$ .....                                                                     | 4 |
| <b>Figure S4.</b> EDS spectrum acquired on micrometric particles of <b>BaCo<sub>3</sub>-A</b> .....                                                                               | 4 |
| <b>Figure S5.</b> Thermogravimetric curve of microstructured <b>BaCo<sub>3</sub>-B</b> recorded in air.....                                                                       | 5 |
| <b>Figure S6.</b> Rietveld refinement plot for microstructured <b>BaCo<sub>3</sub>-B</b> showing observed, calculated and difference patterns.....                                | 5 |
| <b>Table S2.</b> Structural parameters and crystallite size of <b>BaCo<sub>3</sub>-B</b> .....                                                                                    | 6 |
| <b>Figure S7.</b> Comparison of FT-IR and Raman spectra of microstructured <b>BaCo<sub>3</sub>-B</b> and $\text{BaCo}_3(\text{VO}_4)_2(\text{OH})_2$ nanoparticles.....           | 6 |
| <b>Figure S8.</b> Magnetic field dependence of magnetisation measured at several temperatures for <b>BaCo<sub>3</sub>-B</b> .....                                                 | 7 |
| <b>Figure S9.</b> Fragment of a kagome layer in the $\text{BaCo}_3(\text{VO}_4)_2(\text{OH})_2$ crystal structure.....                                                            | 7 |
| <b>References</b> .....                                                                                                                                                           | 8 |

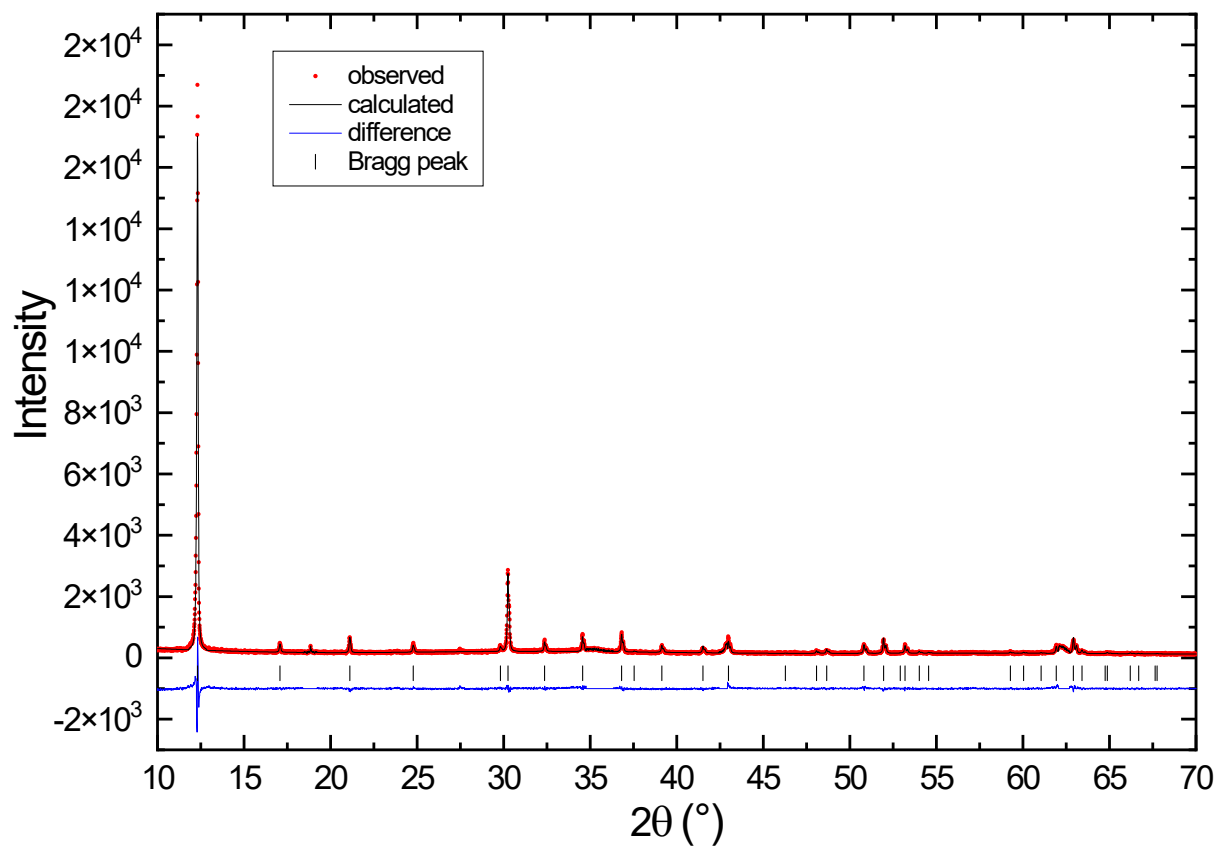

**Figure S1.** Rietveld refinement plot for  $\text{Co}_3\text{V}_2\text{O}_7(\text{OH})_2 \cdot 2\text{H}_2\text{O}$  showing observed, calculated and difference patterns. The high-level noisy pattern is due to cobalt fluorescence.

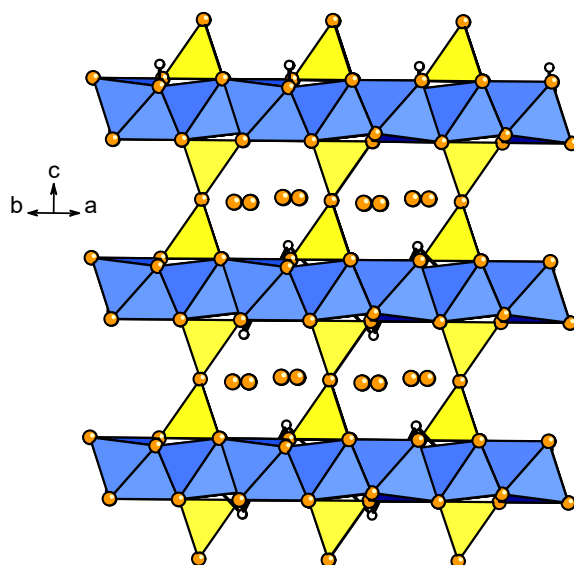

**Figure S2.** Crystal structure of  $\text{Co}_3\text{V}_2\text{O}_7(\text{OH})_2 \cdot 2\text{H}_2\text{O}$ . Blue octahedra:  $\text{CoO}_6$ , yellow tetrahedra:  $\text{VO}_4$ , orange sphere: oxygen, white sphere: hydrogen.

**Table S1.** Structural parameters and crystallite size of  $\text{Co}_3\text{V}_2\text{O}_7(\text{OH})_2 \cdot 2\text{H}_2\text{O}$ .

| SG $P\bar{3}m$ : $a=5.9886(3)$ Å, $c=7.1804(4)$ Å, Cryst. size= $217(5)$ nm $\perp$ [001] |            |           |            |     |  |                                                |
|-------------------------------------------------------------------------------------------|------------|-----------|------------|-----|--|------------------------------------------------|
| Atom                                                                                      | x          | y         | z          | SOF |  | $U_{\text{iso}}$<br>Equiv<br>(Å <sup>2</sup> ) |
| Co <sub>1</sub>                                                                           | 0.5        | 0         | 0          | 1   |  | 0.019(7)                                       |
| V <sub>1</sub>                                                                            | 0          | 0         | 0.2494(16) | 1   |  | 0.034(7)                                       |
| O <sub>1</sub>                                                                            | 0.6667     | 0.3333    | 0.874(5)   | 1   |  | 0.000(7)                                       |
| O <sub>2</sub>                                                                            | 0.155(3)   | 0.311 (5) | 0.829 (2)  | 1   |  | 0.000                                          |
| O <sub>3</sub>                                                                            | 0          | 0         | 0.5        | 1   |  | 0.000                                          |
| O <sub>4</sub>                                                                            | 0.7548(13) | 0.374(6)  | 0.482(12)  | 1   |  | 0.000                                          |
| H <sub>1</sub>                                                                            | 0.6667     | 0.3333    | 0.75*      | 1   |  | 0.02*                                          |
| GOF= 1.41, Rwp= 9.49, Rp= 7.43                                                            |            |           |            |     |  |                                                |

| Aniso.<br>ADP (Å <sup>2</sup> ) | $U^{11}$  | $U^{22}$  | $U^{33}$ | $U^{12}$  | $U^{13}$  | $U^{23}$ |
|---------------------------------|-----------|-----------|----------|-----------|-----------|----------|
| Co <sub>1</sub>                 | 0.013(9)  | 0.002(10) | 0.039(6) | 0.001(5)  | 0.014(11) | 0.03(2)  |
| V <sub>1</sub>                  | 0.032(10) | 0.032     | 0.037(9) | 0.0216(5) | 0         | 0        |

\*not refined

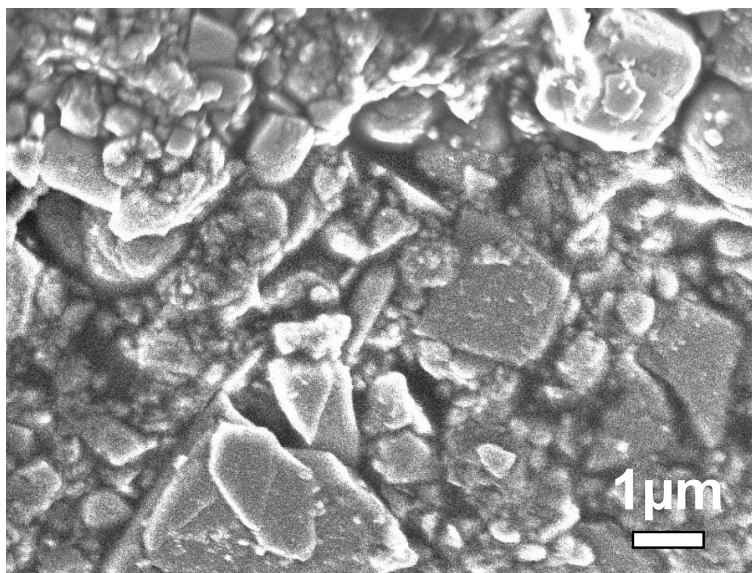

**Figure S3.** SEM image of  $\text{Co}_3\text{V}_2\text{O}_7(\text{OH})_2 \cdot 2\text{H}_2\text{O}$ .

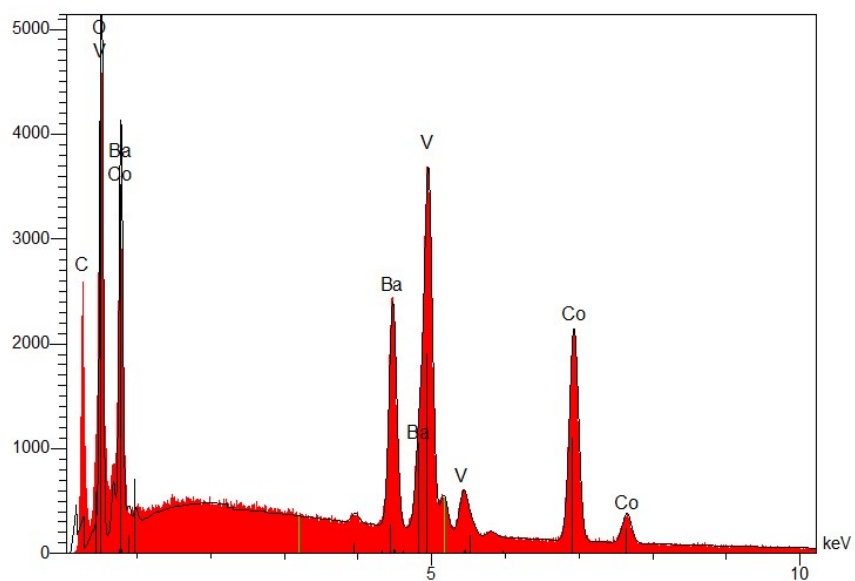

**Figure S4.** EDS spectrum acquired on micrometric particles of  $\text{BaCo}_3\text{-A}$  (a similar spectrum has been obtained for  $\text{BaCo}_3\text{-B}$ ).

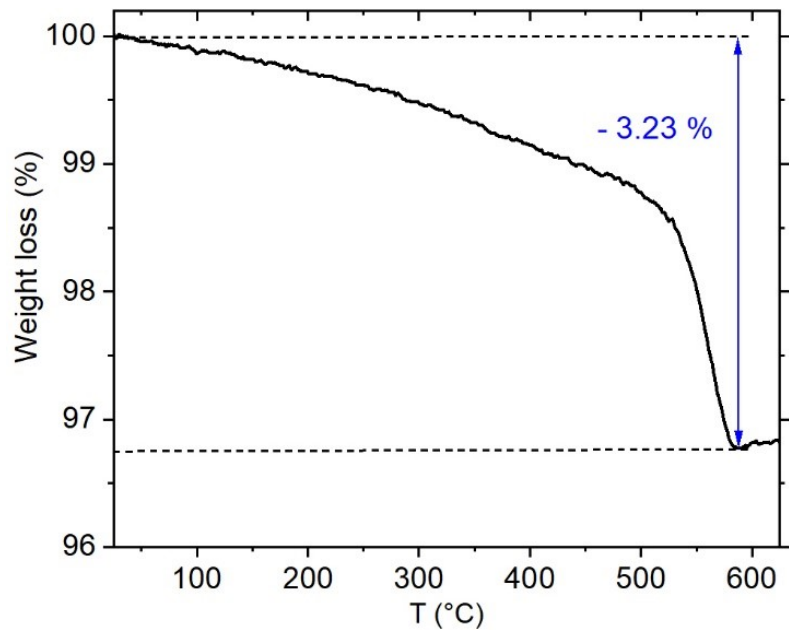

**Figure S5.** Thermogravimetric curve of microstructured  $\text{BaCo}_3\text{-B}$  recorded in air.

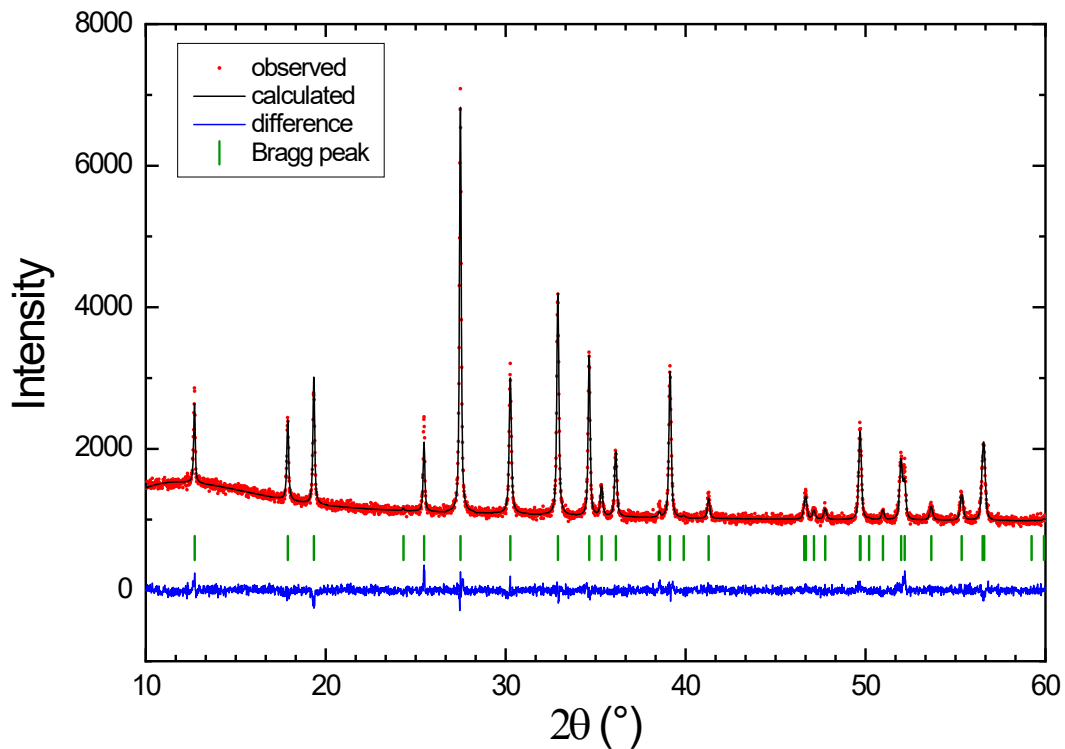

**Figure S6.** Rietveld refinement plot for microstructured  $\text{BaCo}_3\text{-B}$  showing observed, calculated and difference patterns. The high-level noisy pattern is due to cobalt fluorescence.

**Table S2.** Structural parameters and crystallite size of **BaCo<sub>3</sub>-B**.

| SG $R^{3m}$ : $a=5.9238(2)$ Å, $c=21.0609(9)$ Å, Cryst. size= $92(3)$ nm $\perp$ [001], $47(5)$ nm // [001] |           |            |            |     |                                   |
|-------------------------------------------------------------------------------------------------------------|-----------|------------|------------|-----|-----------------------------------|
| Atom                                                                                                        | x         | y          | z          | SOF | $U_{iso}$ Equiv (Å <sup>2</sup> ) |
| Ba <sub>1</sub>                                                                                             | 0.6667    | 0.3333     | 0.8333     | 1   | 0.033(2)                          |
| Co <sub>1</sub>                                                                                             | 0.8333    | 0.6667     | 0.6667     | 1   | 0.013(2)                          |
| V <sub>1</sub>                                                                                              | 0.3333    | 0.6667     | 0.7527(3)  | 1   | 0.015(3)                          |
| O <sub>1</sub>                                                                                              | 0.3333    | 0.6667     | 0.832(8)   | 1   | 0.005(3)                          |
| O <sub>2</sub>                                                                                              | 0.4930(9) | 0.5070(10) | 0.7275(4)  | 1   | 0.005                             |
| O <sub>3</sub>                                                                                              | 0         | 0          | 0.7030(10) | 1   | 0.005                             |
| H <sub>1</sub>                                                                                              | 0         | 0          | 0.7494*    | 1   | 0.008*                            |

GOF= 1.11, Rwp= 3.32, Rp= 2.62

\*not refined

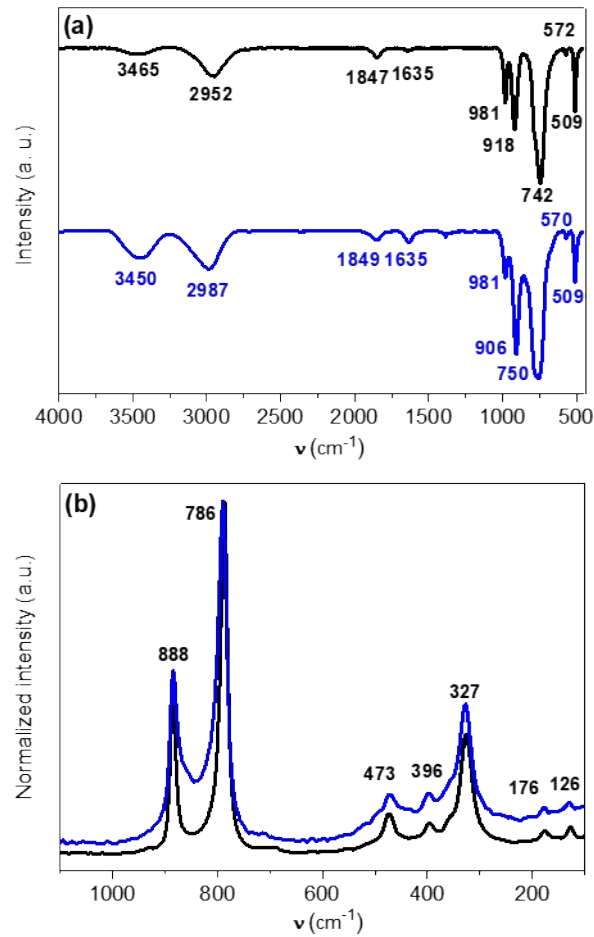

**Figure S7.** Comparison of (a) FT-IR and (b) Raman spectra of microstructured **BaCo<sub>3</sub>-B** (black line) and **BaCo<sub>3</sub>(VO<sub>4</sub>)<sub>2</sub>(OH)<sub>2</sub> nanoparticles<sup>S1</sup> (NPs)** (blue line).

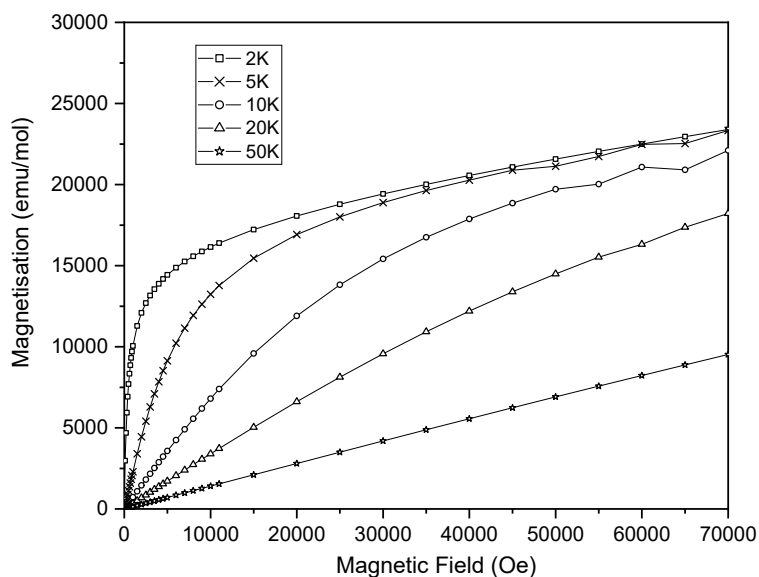

**Figure S8.** Magnetic field dependence of magnetisation measured at several temperatures for  $\text{BaCo}_3\text{-B}$ .

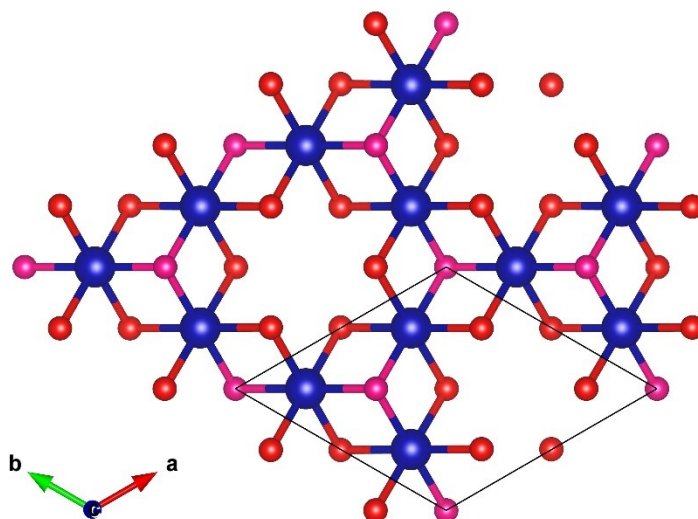

**Figure S9.** Fragment of a kagome layer in the  $\text{BaCo}_3(\text{VO}_4)_2(\text{OH})_2$  crystal structure (projection along  $[001]$  direction). Blue, red, and pink spheres represent Co, O<sub>2</sub>, and O<sub>3</sub> atoms (see Tables 1 and S2), respectively. Barium, vanadium, and hydrogen atoms have been removed for clarity. Each kagome layer is formed from compressed  $\text{Co}(\text{O}_2)_4(\text{O}_3)_2$  octahedra with  $d_{\text{Co-O}_2} = 2.176(4)$  Å and  $d_{\text{Co-O}_3} = 1.9407(6)$  Å.

## References

[S1] R. Dessapt, L. Lajaunie, J. J. Calvino, P. Deniard, I. Trenque and C. Payen, *J. Mater. Chem. C*, 2022, **10**, 3287-3291.
